# Supplementary material for: Poly(A) selection limits detection of long and alternatively spliced transcripts compared with rRNA depletion in RNA-Sequencing
Source: Research Square preprint supplement (doi:10.21203/rs.3.rs-8195045/v1), 2025-12-08
Supplement: Supplementary file 1 [file 00112a40d6d1e976713b298c.xlsx]

## Sheet: MYOD1_polyA_GBC_coverage_raw
Percentile	1	2	3	4	5	6	7	8	9	10	11	12	13	14	15	16	17	18	19	20	21	22	23	24	25	26	27	28	29	30	31	32	33	34	35	36	37	38	39	40	41	42	43	44	45	46	47	48	49
polyA_1	0	0	0	0	3	3	3	11	17	19	19	19	19	18	28	29	28	31	28	21	24	27	25	19	7	3	3	3	8	7	7	10	10	13	13	12	19	17	19	17	17	17	24	24	32	33	50	55	56
polyA_2	22	26	28	31	64	136	171	180	266	276	294	320	329	295	274	291	285	322	320	318	329	354	343	318	266	258	243	251	260	229	194	195	195	221	200	187	228	225	226	224	220	182	174	170	153	162	163	176	164
polyA_3	77	84	88	86	158	334	457	497	620	640	686	738	774	677	615	643	696	732	725	701	710	764	727	677	539	520	487	512	519	483	440	419	415	412	410	399	441	430	424	427	416	371	347	330	335	337	329	386	368
polyA_4	94	102	101	99	215	478	654	720	936	953	1026	1110	1169	1066	1036	1088	1193	1267	1242	1191	1149	1206	1091	986	823	776	703	700	722	647	571	543	612	652	608	598	700	707	702	704	663	619	600	594	548	572	536	590	560
polyA_5	46	45	48	48	80	165	238	243	302	309	325	352	368	331	315	341	333	356	357	332	335	353	335	321	288	286	252	271	286	270	240	228	245	230	233	230	240	230	226	226	221	203	175	176	176	172	176	179	175
polyA_6	36	40	41	47	91	202	261	280	397	401	409	444	481	446	444	466	497	527	521	496	497	526	491	446	382	361	360	361	365	311	274	264	268	276	262	258	276	267	268	275	258	246	234	232	218	222	217	231	228
polyA_7	13	11	14	18	42	88	108	122	165	175	190	205	214	182	172	182	171	193	189	210	207	227	223	203	172	161	131	138	139	116	105	99	111	114	111	104	120	119	119	118	111	91	85	81	84	83	89	101	96
polyA_8	32	35	32	24	49	113	155	167	250	251	269	285	300	260	251	263	272	289	290	289	287	308	296	282	227	221	207	218	226	208	180	171	195	188	189	176	200	190	193	185	177	150	132	143	130	137	134	165	152
polyA_9	35	39	46	48	78	159	191	212	270	283	298	328	341	305	287	304	299	314	318	328	317	362	365	344	280	277	272	274	303	278	230	250	263	289	266	251	265	265	262	264	246	194	188	178	179	187	183	219	224
polyA_10	10	11	11	12	31	86	108	128	159	157	168	179	184	156	115	114	128	147	165	180	193	199	211	220	168	159	159	158	164	155	143	136	144	148	141	122	145	131	130	141	126	110	105	94	87	85	94	105	95
polyA_11	71	76	76	71	151	310	370	437	577	593	627	675	684	619	614	633	665	762	790	763	759	787	720	687	576	514	475	486	504	481	412	393	409	430	399	393	456	462	462	460	436	390	368	355	360	352	348	370	379
polyA_12	89	94	103	111	174	348	420	456	563	591	627	664	686	613	582	590	620	636	622	613	622	679	647	636	538	536	519	550	572	513	453	435	444	452	411	373	404	394	408	412	391	321	310	309	308	312	271	286	287
polyA_13	34	37	39	43	60	119	172	209	246	250	258	288	293	258	245	249	258	272	272	252	256	280	262	248	189	178	175	179	189	179	161	154	169	186	174	153	170	165	160	155	146	119	110	105	101	103	103	109	109
polyA_14	101	102	101	103	189	376	476	518	635	643	687	729	764	660	639	674	720	744	758	733	727	789	746	648	547	557	530	507	525	473	431	431	462	443	402	397	437	437	442	436	427	371	344	327	314	324	303	366	381
polyA_15	17	20	18	19	35	95	112	127	156	160	175	178	183	167	142	146	156	163	178	186	185	200	193	171	152	161	139	130	141	143	132	126	138	122	113	111	116	120	109	111	111	95	91	86	76	79	81	96	93
polyA_16	46	48	47	48	69	164	193	215	269	274	294	310	318	282	254	255	272	301	308	306	320	329	324	309	243	256	232	248	259	262	242	240	244	276	262	249	283	264	263	259	258	214	191	187	171	192	188	218	203
polyA_17	114	116	121	128	260	538	727	814	1070	1097	1153	1224	1257	1122	1042	1066	1072	1184	1187	1188	1195	1287	1261	1185	962	952	912	916	937	837	714	718	788	807	784	769	852	844	855	845	786	678	628	603	582	604	644	715	702
polyA_18	50	53	65	63	107	246	341	381	496	512	547	587	623	581	577	583	609	629	611	611	603	644	599	560	478	476	440	460	461	431	365	336	332	325	315	309	392	388	393	384	372	345	334	337	299	321	332	363	379
polyA_19	20	24	24	24	45	83	101	118	156	155	162	171	180	159	149	152	182	201	194	187	189	192	194	181	126	112	101	108	111	98	94	107	125	134	125	131	144	149	156	147	139	127	116	110	95	103	86	94	96
polyA_20	27	27	28	27	51	124	159	178	235	241	249	261	263	227	207	209	202	232	238	239	256	288	268	262	236	225	210	204	225	190	172	171	192	195	182	178	205	170	179	184	178	151	142	144	129	149	144	163	160
polyA_21	18	19	22	21	49	114	147	170	225	239	249	277	281	248	241	249	258	257	263	260	257	274	264	257	232	230	206	201	210	209	190	173	179	189	184	178	218	210	203	207	194	180	161	160	157	153	155	174	176
polyA_22	29	30	34	38	68	158	191	211	295	298	321	351	374	336	306	326	309	356	354	365	377	398	375	376	322	320	292	308	309	271	251	224	235	262	259	246	278	258	274	266	254	227	215	204	192	203	189	214	225
polyA_23	0	0	0	0	0	0	0	0	0	0	2	3	3	3	3	3	3	3	3	9	9	17	15	16	17	19	19	13	13	11	11	18	33	31	29	31	34	33	33	33	18	18	13	13	14	5	7	9	0
[truncated: 51 more columns]

## Sheet: OBSCN_polyA_GBC_coverage_raw
Percentile	1	2	3	4	5	6	7	8	9	10	11	12	13	14	15	16	17	18	19	20	21	22	23	24	25	26	27	28	29	30	31	32	33	34	35	36	37	38	39	40	41	42	43	44	45	46	47	48	49
polyA_1	0	0	7	113	63	73	60	68	72	149	1	142	292	324	273	238	291	244	353	73	261	426	142	162	165	147	83	85	180	55	54	46	78	60	58	78	84	115	36	102	75	129	195	251	238	223	165	81	61
polyA_2	0	0	325	1033	745	916	768	762	643	747	37	586	1144	1452	1186	1189	1180	1072	925	70	962	51	1074	1387	1436	1556	948	758	1486	1139	1091	997	1195	995	1157	1316	1826	1757	34	1771	1090	1484	2227	2219	2600	2275	2163	1625	1819
polyA_3	0	0	450	1458	1000	1254	1138	1141	891	1082	33	782	1480	1854	1390	1493	1546	1411	1190	75	1223	62	1285	1656	1653	1989	1021	846	1771	1484	1476	1282	1431	1374	1481	1694	2036	2009	51	1968	1347	1732	2669	2593	2897	2612	2405	1861	2274
polyA_4	0	0	86	451	263	363	353	306	233	320	16	261	540	611	548	435	565	473	489	74	364	54	416	552	558	675	365	288	669	465	504	427	519	396	475	582	677	813	12	681	497	644	1143	1024	1328	1242	1114	943	968
polyA_5	0	0	279	869	535	723	642	610	568	626	34	555	887	1206	994	851	994	816	1059	86	709	60	864	1047	971	1157	653	565	1114	881	891	779	886	733	886	999	1273	1343	42	1280	883	1156	1739	1638	1740	1665	1553	1160	1669
polyA_6	0	0	491	1594	1052	1397	1258	1133	888	1096	56	999	1713	2105	1720	1678	1767	1592	1267	54	1389	72	1499	1976	1873	2159	1183	966	2011	1618	1533	1318	1664	1502	1576	1803	2322	2492	34	2060	1555	1844	3232	2854	3600	3318	2902	2233	2422
polyA_7	0	0	149	535	389	513	467	414	373	431	26	333	611	841	647	696	709	606	562	50	510	42	628	777	788	947	579	483	867	725	704	583	681	650	688	827	1146	1077	22	1038	669	939	1368	1333	1490	1434	1299	1002	1246
polyA_8	0	0	300	1019	731	984	828	844	729	757	44	697	1191	1470	1189	1360	1223	1020	822	55	978	31	1064	1319	1310	1512	888	689	1427	1201	1083	985	1160	1144	1208	1425	1872	1753	30	1758	1233	1576	2212	2149	2223	2206	1971	1494	2216
polyA_9	0	0	379	1188	809	936	812	830	668	828	39	694	1229	1474	1056	1222	1255	1113	790	71	1017	79	1212	1316	1335	1642	886	731	1487	1190	1112	943	1186	1075	1216	1601	2024	1905	48	1749	1272	1540	2409	2376	2557	2325	2049	1521	2068
polyA_10	0	0	211	706	549	610	563	641	513	581	23	435	891	1019	775	857	885	754	688	60	708	68	754	912	918	1118	613	533	1001	838	787	737	774	775	810	1107	1429	1284	27	1277	810	1103	1708	1567	1627	1534	1581	1145	1514
polyA_11	0	0	82	358	217	291	231	204	191	275	22	230	390	582	496	415	479	398	369	74	345	74	346	461	458	527	321	241	558	390	443	408	444	393	461	595	695	722	30	608	448	542	994	915	1204	1058	912	785	945
polyA_12	0	0	289	873	637	784	701	714	537	597	22	508	1029	1217	938	1020	1016	950	677	40	693	40	928	1105	1201	1371	797	621	1267	982	914	762	995	860	979	1247	1635	1608	23	1376	924	1280	2029	1926	2180	1943	1818	1404	1785
polyA_13	0	0	442	1489	1039	1240	1074	1134	913	1013	29	820	1554	1705	1281	1399	1512	1406	1256	48	1131	47	1293	1679	1749	2012	1127	865	1738	1532	1500	1319	1549	1393	1526	1635	2369	2296	22	2053	1467	1884	2878	2647	3246	2705	2377	1877	2470
polyA_14	0	0	392	1334	919	1183	1106	1070	762	977	39	836	1568	1795	1393	1460	1493	1402	1327	103	1142	73	1146	1640	1627	1964	999	799	1663	1333	1318	1185	1343	1224	1291	1595	1916	2028	39	1830	1289	1751	2655	2453	2960	2519	2312	1822	2217
polyA_15	0	0	357	1173	796	864	772	721	645	781	29	784	1241	1380	1127	1191	1236	1103	794	79	984	69	1059	1361	1347	1575	836	688	1371	1137	1132	1001	1186	1055	1157	1344	1681	1811	48	1559	1150	1464	2247	2158	2542	2197	2107	1523	1942
polyA_16	0	0	223	722	518	610	532	561	447	545	11	368	764	976	804	733	836	734	733	40	591	48	749	930	900	1085	618	541	914	809	704	611	748	745	871	1104	1284	1358	18	1244	811	1035	1559	1515	1657	1606	1495	1144	1343
polyA_17	0	0	129	494	380	421	377	410	323	432	32	349	610	736	609	604	648	623	582	81	577	138	546	675	710	795	438	339	707	618	582	514	549	499	583	728	943	1025	36	868	508	701	1085	1123	1257	1101	1057	793	1177
polyA_18	0	0	66	121	121	139	136	128	107	166	12	137	292	382	291	258	278	254	258	45	199	94	239	232	206	290	150	129	249	168	168	156	192	199	235	252	280	337	8	357	192	310	473	473	545	506	469	405	446
polyA_19	0	0	46	203	115	155	138	161	139	170	18	156	243	313	293	258	297	228	248	36	237	63	223	256	263	323	127	113	285	186	218	191	244	208	229	277	365	346	15	320	272	358	588	535	717	637	593	460	466
polyA_20	0	0	101	404	244	347	273	265	227	301	8	261	456	621	518	569	574	457	352	38	420	51	457	531	494	649	353	252	615	494	435	397	457	376	399	558	727	792	10	740	486	725	1156	1174	1186	1134	1046	790	964
polyA_21	0	0	99	327	233	250	226	251	231	261	10	214	352	514	434	390	387	399	289	44	260	42	345	443	455	457	239	193	434	335	343	292	367	344	337	411	547	582	12	506	398	507	744	809	933	779	742	622	787
polyA_22	0	0	110	324	263	285	276	251	230	301	8	226	414	496	396	428	380	453	315	37	316	70	350	434	457	561	281	244	507	435	407	383	420	375	393	553	738	745	19	679	440	583	852	903	1049	923	993	770	936
polyA_23	0	0	5	60	40	55	68	38	93	101	0	108	206	278	198	157	184	195	343	23	186	230	83	65	44	133	62	69	58	37	53	72	52	75	107	45	99	87	7	84	56	47	175	342	216	206	228	203	90
[truncated: 51 more columns]

## Sheet: TTN_polyA_GBC_coverage_raw
Percentile	1	2	3	4	5	6	7	8	9	10	11	12	13	14	15	16	17	18	19	20	21	22	23	24	25	26	27	28	29	30	31	32	33	34	35	36	37	38	39	40	41	42	43	44	45	46	47	48	49
polyA_1	0	144	112	185	57	217	18	33	52	47	48	67	25	59	9	0	4	0	42	30	20	78	14	11	24	155	1819	6051	119	15	202	54	30	28	58	53	29	74	20	34	42	39	31	91	39	96	45	280	280
polyA_2	3	585	155	227	112	71	63	115	159	177	181	325	292	369	702	8	4	5	82	83	83	110	55	52	93	224	516	946	249	63	240	157	139	115	137	106	118	125	94	78	84	86	75	96	103	82	101	131	126
polyA_3	1	1941	203	255	98	44	80	90	154	159	171	335	306	295	598	9	9	10	100	84	93	105	45	44	75	208	532	984	276	165	219	123	93	68	89	91	73	74	75	76	55	64	70	73	71	61	73	117	112
polyA_4	0	801	211	322	148	132	113	128	200	217	257	433	453	548	597	3	15	15	82	77	62	126	69	47	158	328	732	1320	264	79	330	294	244	109	140	153	135	135	112	107	78	101	99	116	90	116	98	101	126
polyA_5	0	1145	192	236	100	65	46	86	102	167	223	398	428	416	539	1	5	4	99	85	114	87	38	40	88	200	475	977	282	65	256	122	111	74	84	94	62	71	56	41	37	59	63	74	62	58	77	103	97
polyA_6	0	817	216	344	98	88	60	93	145	164	166	335	302	346	1065	4	1	12	91	90	48	81	46	38	92	202	506	996	269	68	264	147	157	84	92	120	105	104	68	79	62	78	60	88	90	79	84	105	142
polyA_7	1	600	222	251	85	96	74	130	219	167	221	387	314	423	766	0	1	2	74	78	106	141	64	53	112	281	583	1072	293	141	260	186	184	101	142	154	133	137	137	102	103	92	104	110	111	112	104	155	122
polyA_8	2	633	247	354	140	92	80	136	191	224	259	483	440	602	1444	3	9	4	93	76	103	119	54	46	170	369	638	1079	321	98	257	238	239	131	109	112	116	127	104	110	90	89	87	108	99	95	117	132	178
polyA_9	0	1453	622	763	467	364	286	418	507	511	519	823	708	790	653	9	14	9	274	269	248	291	217	117	324	968	2003	3078	1081	174	973	971	689	405	481	381	437	451	302	361	300	289	265	327	337	297	369	310	328
polyA_10	7	625	268	262	96	66	62	98	109	131	187	363	328	397	708	5	2	7	44	46	67	82	56	36	64	262	569	1067	300	113	264	151	125	63	89	86	63	73	63	81	46	58	49	61	65	73	105	143	152
polyA_11	1	573	216	325	114	71	69	70	209	226	251	475	448	549	777	6	8	3	105	105	100	143	65	47	117	242	589	1145	237	169	261	149	174	81	105	104	100	96	88	98	81	62	59	78	83	68	92	139	145
polyA_12	1	719	313	263	216	168	110	140	207	263	270	476	413	518	1064	3	6	5	144	102	142	172	116	77	138	360	833	1424	482	250	427	318	257	134	186	219	160	160	172	156	122	142	130	116	142	132	177	168	182
polyA_13	2	733	235	246	110	56	53	75	116	148	174	319	283	287	405	7	4	3	80	118	103	99	55	36	85	207	392	859	220	66	169	91	100	83	72	99	81	79	80	62	58	52	46	85	50	71	74	89	80
polyA_14	0	2396	318	445	106	70	71	86	181	192	215	404	404	515	885	1	0	1	96	92	102	112	43	39	79	263	637	1290	436	110	369	212	176	109	122	94	110	81	88	65	64	58	48	89	76	65	95	113	89
polyA_15	6	1301	306	377	130	95	99	148	203	255	254	443	494	560	1090	1	5	4	65	85	119	132	64	61	109	288	627	1197	368	76	292	189	156	109	102	129	161	114	88	101	67	77	91	103	110	114	140	144	143
polyA_16	0	968	636	724	426	293	250	347	440	373	364	772	598	699	776	4	3	4	172	235	195	225	139	129	286	1019	1879	3265	714	230	1184	1137	794	405	404	371	277	275	259	300	275	274	236	303	314	240	325	259	310
polyA_17	0	2112	1868	1228	2118	1671	1379	1894	2362	1851	1609	2199	1652	1563	328	36	19	20	1351	1080	1296	1505	928	788	1734	3460	5145	6756	3395	1801	3648	3608	3526	2124	2451	2435	2175	2128	1821	1929	1719	1965	1740	2093	2060	1844	1849	1434	1915
polyA_18	1	518	312	345	238	144	66	104	177	129	168	417	412	412	182	0	11	8	122	88	119	126	68	29	79	231	622	2312	251	114	273	193	124	126	98	140	63	104	91	106	88	66	74	114	78	100	130	395	258
polyA_19	4	756	209	261	103	70	47	94	121	126	132	299	237	327	142	2	1	2	104	102	88	160	52	42	71	183	878	2150	335	184	380	215	155	114	114	108	96	107	87	70	57	63	81	107	83	87	110	273	316
polyA_20	0	777	258	376	232	184	104	210	198	199	189	385	354	356	241	1	3	0	122	124	123	232	89	71	148	404	1690	4198	681	243	589	546	341	195	265	234	163	162	129	146	143	129	143	193	170	160	178	453	360
polyA_21	0	644	288	317	286	237	152	238	292	268	320	486	372	435	293	7	6	6	191	186	195	240	129	107	285	700	1604	2738	848	361	740	664	533	352	289	324	306	279	217	209	195	204	178	210	235	207	221	264	263
polyA_22	0	665	273	287	174	100	59	102	196	177	225	503	425	407	289	6	2	5	114	129	103	127	80	56	88	293	801	1862	515	191	376	251	201	127	142	129	124	132	84	108	93	80	86	131	115	82	140	198	187
polyA_23	0	230	341	209	167	207	37	114	226	100	112	262	159	283	21	0	0	0	180	126	81	256	88	107	73	441	2840	7045	416	70	612	534	254	187	168	199	149	108	110	169	200	207	163	223	178	195	164	1678	1087
[truncated: 51 more columns]

## Sheet: MYOD1_riboD_GBC_coverage_raw
Percentile	1	2	3	4	5	6	7	8	9	10	11	12	13	14	15	16	17	18	19	20	21	22	23	24	25	26	27	28	29	30	31	32	33	34	35	36	37	38	39	40	41	42	43	44	45	46	47	48	49
riboD_1	36	42	42	40	77	130	170	182	200	219	245	279	284	248	266	278	307	292	270	258	230	264	214	202	185	173	174	173	170	135	110	104	83	82	79	68	70	64	57	45	43	43	47	53	71	80	120	131	141
riboD_2	58	67	72	65	118	242	318	351	405	418	469	498	515	475	475	522	603	604	585	567	564	596	500	466	372	381	380	400	420	349	289	310	271	282	265	251	262	228	227	170	156	119	116	118	134	174	228	239	259
riboD_3	43	44	45	43	82	158	201	210	251	283	302	334	373	354	346	398	446	462	445	446	435	472	398	369	308	283	289	295	297	244	223	237	212	222	187	185	176	168	150	121	109	85	100	103	120	134	169	181	207
riboD_4	26	29	35	32	63	117	171	172	206	236	258	277	294	273	274	303	333	336	329	323	323	346	303	280	261	260	263	266	271	253	241	256	225	251	233	230	252	229	221	190	191	156	160	170	177	218	238	228	251
riboD_23	7	8	11	15	19	37	52	54	63	65	69	73	74	81	87	82	89	95	87	92	98	98	86	89	80	83	84	90	93	87	92	78	81	88	84	90	94	88	81	77	84	69	67	61	61	73	77	80	80
riboD_5	27	28	34	33	53	110	140	155	171	195	205	225	235	226	228	246	279	289	271	269	280	302	263	257	228	226	240	242	265	234	232	257	250	288	285	287	316	304	308	281	279	238	228	239	236	238	239	254	263
riboD_6	36	37	44	46	71	145	176	171	196	221	246	294	319	287	306	336	370	363	336	344	336	358	328	301	245	260	257	259	279	236	197	222	206	218	198	176	177	156	151	138	124	103	103	109	114	119	159	159	159
riboD_7	44	56	59	61	121	210	273	295	345	387	426	481	515	479	516	560	626	618	579	573	582	619	512	487	417	427	435	457	471	441	419	434	427	472	465	454	516	493	512	499	486	420	404	406	396	410	415	423	407
riboD_8	11	15	27	30	54	99	120	132	162	198	210	223	243	231	241	269	283	272	262	264	257	281	259	274	243	248	246	242	260	243	228	236	219	266	268	282	295	285	283	278	279	222	215	215	215	221	215	230	226
riboD_9	51	56	57	60	98	173	207	209	241	265	301	330	339	317	332	342	377	371	360	380	373	401	344	319	274	274	271	279	288	250	231	232	206	224	203	202	212	191	177	153	152	124	123	125	137	161	191	196	205
riboD_10	39	40	40	43	70	145	175	191	195	224	244	271	281	240	248	272	328	330	322	316	310	346	291	296	244	242	238	248	264	246	245	259	243	259	265	260	314	311	302	299	296	273	263	258	240	245	246	262	265
riboD_11	31	33	38	40	84	156	217	227	268	307	340	351	362	334	363	386	442	448	417	412	405	438	355	329	300	315	324	345	346	329	328	334	310	327	321	326	375	384	386	378	381	350	357	345	323	322	329	332	339
riboD_12	40	42	42	44	77	155	206	210	249	278	294	316	353	324	336	348	398	407	379	378	365	391	329	329	295	289	298	322	324	286	292	282	265	276	253	236	275	267	267	258	265	228	215	221	218	228	232	253	255
riboD_13	35	37	42	41	71	160	196	198	233	254	292	321	330	299	306	342	362	369	340	331	331	361	306	288	223	222	225	228	238	191	182	198	184	211	202	197	200	180	169	153	150	137	140	145	160	160	175	184	193
riboD_14	22	21	23	26	50	98	121	134	157	177	191	216	220	212	215	235	270	291	275	288	279	297	268	269	217	217	231	254	268	236	231	246	224	251	243	227	259	244	248	239	236	207	194	214	204	201	203	218	205
riboD_15	82	88	98	98	177	321	374	399	458	506	569	623	653	595	589	634	770	756	697	710	697	753	651	639	491	539	582	609	636	580	568	585	577	627	604	556	622	588	588	567	584	474	459	453	445	461	451	491	504
riboD_16	23	25	30	27	55	96	132	135	159	164	182	203	211	196	198	213	241	241	245	232	219	233	203	206	177	186	188	181	187	173	162	157	160	180	168	188	219	209	199	200	199	169	165	162	154	156	148	160	154
riboD_17	30	32	35	38	71	133	177	184	233	246	263	296	313	275	294	305	343	340	340	341	339	360	281	275	256	273	282	292	281	271	291	291	283	307	288	293	342	336	326	330	317	260	254	255	227	264	271	280	273
riboD_18	77	82	83	84	165	354	443	498	617	683	736	808	855	772	782	808	881	881	862	842	831	894	787	718	598	599	587	601	592	469	385	388	339	344	300	273	279	243	217	163	136	125	127	147	181	206	289	317	361
riboD_19	39	44	49	49	86	153	201	201	218	236	255	279	294	263	273	295	328	322	316	306	292	323	279	267	227	217	221	227	225	175	144	144	123	124	108	101	97	85	80	61	53	34	35	50	67	91	129	134	146
riboD_20	18	21	23	29	50	70	85	90	105	119	129	167	174	159	173	184	216	214	199	196	191	207	184	190	156	160	176	181	174	159	151	156	141	158	157	145	148	130	129	124	127	120	117	123	124	128	139	140	143
riboD_21	82	85	91	93	158	287	343	359	444	469	504	567	574	537	535	590	637	642	615	605	581	645	559	558	463	475	508	530	551	501	478	517	533	587	548	545	580	576	575	575	568	504	481	487	493	488	466	456	494
riboD_22	9	11	11	13	33	58	73	76	89	97	103	109	120	116	117	116	118	121	131	126	129	131	120	118	111	105	111	106	111	94	91	98	94	86	82	67	74	67	66	53	62	51	57	59	68	70	79	76	81
[truncated: 51 more columns]

## Sheet: OBSCN_riboD_GBC_coverage_raw
Percentile	1	2	3	4	5	6	7	8	9	10	11	12	13	14	15	16	17	18	19	20	21	22	23	24	25	26	27	28	29	30	31	32	33	34	35	36	37	38	39	40	41	42	43	44	45	46	47	48	49
riboD_1	0	0	76	7071	6029	7439	7051	5835	4940	4547	508	1586	2520	1960	1784	2437	2312	1084	1267	360	1643	144	4750	4001	5029	6015	4601	2665	5193	6077	5161	5472	5553	4888	5424	5526	6035	6139	316	6675	3917	4541	2739	2030	1915	1637	2517	1635	2714
riboD_2	0	0	203	7274	6410	7398	7129	5794	4939	4682	525	1708	2943	2079	1834	2595	2631	1319	1533	301	1987	129	4857	4196	5322	6629	5021	2892	5579	6331	5420	5918	5792	5076	5763	5779	5997	6818	219	6928	4388	5162	3170	2189	2245	1897	2798	1961	2715
riboD_3	0	0	346	7328	6776	7505	7152	5927	5474	4873	451	1602	3163	2093	1782	2941	3041	1429	1653	235	2084	89	5266	4985	6045	7458	5155	3295	6290	6904	6324	6139	6389	5629	6524	6802	6924	6989	313	6720	4977	5795	3451	2371	2364	2251	3171	2120	2798
riboD_4	0	0	231	3842	2971	4116	3997	3620	2238	2251	207	677	894	718	685	823	820	328	580	151	533	83	2385	1709	2276	2987	2143	1286	2103	3250	2541	2607	2575	2338	2617	2508	2387	2751	139	3215	1626	2173	1248	720	625	629	925	794	1284
riboD_23	0	0	1485	6526	4856	6727	6091	5870	3443	3871	437	1406	2257	1714	1677	2026	1926	952	1348	420	1594	259	4779	3376	4006	4705	3605	2111	3767	5180	3956	4209	4332	3761	4363	4497	4240	5210	276	5614	3147	4012	2696	1819	1990	1660	2132	1600	2308
riboD_5	0	0	1161	6808	5167	6838	6666	5998	4025	4215	343	1401	2394	1732	1558	2052	2176	1093	1319	207	1484	128	5241	3636	4435	5682	4496	2525	4339	5891	4571	4881	4704	4082	4787	5093	4771	5723	194	6434	3340	4508	2904	1909	1772	1618	2287	1552	2287
riboD_6	0	0	514	7161	6406	7393	7026	5962	4738	4192	494	1753	2753	1891	1671	2513	2640	1308	1128	251	1823	124	4783	4264	5195	6562	5101	3046	5418	6332	5213	5650	5732	5019	5836	5676	5888	6682	320	6811	4335	4754	3013	2161	2145	1969	2853	1792	2625
riboD_7	0	0	641	5007	3998	5949	5738	5236	3383	3171	313	969	1561	1162	1180	1248	1102	703	1076	231	1121	123	3948	2740	3402	4056	2940	1789	3073	4586	3763	3945	4116	3411	4002	4000	3801	4504	296	5202	2580	3554	2342	1300	1387	1063	1717	1422	1847
riboD_8	0	0	1780	6146	4425	6052	6214	5673	3392	3472	293	832	1324	846	865	830	698	485	525	165	798	126	4120	2673	3374	4914	3297	1727	2900	4839	4091	4167	4163	3670	3890	3756	3561	4453	217	4852	2291	3633	1832	1034	933	738	1364	1135	1658
riboD_9	0	0	133	2977	2204	3085	2904	2639	1678	1684	173	657	1057	769	721	915	959	402	432	135	682	53	2188	1472	1750	2364	1806	1076	1951	2418	1999	2277	2232	1809	2195	2109	2339	2617	172	2830	1506	1952	1194	757	822	712	1022	745	1073
riboD_10	0	0	4359	7134	7277	7279	6993	6800	6305	5163	772	1921	3542	2709	2345	3126	3078	1593	1524	382	2496	247	6261	5853	6783	7134	4529	3596	6298	6714	6864	5906	7021	6256	6900	7024	6959	6850	476	6522	5322	6508	4154	3035	3192	2637	3833	2923	3778
riboD_11	0	0	968	6032	4390	5562	5400	4727	3096	3434	149	1418	2254	1632	1387	1978	2083	977	879	52	1556	28	5152	3338	4048	4956	3770	2180	3942	5197	3985	4121	4000	3506	4031	4268	4134	4898	76	5387	2880	3755	2369	1745	1765	1637	2037	1324	1799
riboD_12	0	0	657	5826	4476	6025	5643	5056	3281	3178	229	1272	2146	1482	1332	1922	2002	934	1131	190	1425	87	4642	3264	3843	4883	3571	2138	3841	4745	3818	4056	4048	3494	4091	4188	4141	4884	215	5195	3026	3726	2317	1699	1580	1540	1973	1378	2112
riboD_13	0	0	453	7129	6036	7474	7013	5628	4557	4464	425	1482	2601	2048	1818	2405	2250	1105	1536	295	1883	91	4939	4271	5098	6278	4595	2640	5198	6504	5230	5642	5631	4926	5669	5813	5670	6774	333	6805	4133	5159	3173	2225	2240	1957	2759	1891	2564
riboD_14	0	0	807	7146	6518	7348	6989	5665	4864	4593	435	1457	2611	1690	1548	1894	2161	814	1039	320	1548	159	5019	4119	4995	6629	4961	2815	5062	6582	5488	5858	5573	4942	5909	5985	5846	6494	355	6945	4328	5118	3100	1893	1980	1562	2439	1824	2460
riboD_15	0	0	1450	7228	6517	7377	7147	5533	4945	4966	412	1704	2965	2098	1824	2528	2503	975	1510	299	1902	161	4845	4361	5432	6958	5093	3113	5382	6627	5497	5949	5955	5203	5943	6008	6047	6822	425	6943	3950	5020	3393	2251	2113	2032	2733	2042	2878
riboD_16	0	0	2022	7275	7197	7395	7161	6457	5957	5488	537	1957	3419	2470	2021	3205	3090	1600	1824	286	2232	144	5423	5534	6581	7313	4664	3563	6367	6847	6438	6026	6893	6123	7125	7195	7276	6910	372	6620	5169	5884	3658	2520	2559	2295	3523	2178	3263
riboD_17	0	0	2949	7095	5897	7371	7019	5738	4283	4536	511	1679	2816	2074	1838	2582	2705	1171	1169	504	2104	289	4888	4254	5021	6427	4717	2706	4979	6318	5220	5583	5376	4834	5582	5498	5610	6478	383	6945	3932	4714	3353	2168	2222	1997	3043	2119	2614
riboD_18	0	0	219	7097	7042	7315	6860	6855	6247	5195	412	2296	3920	2642	2322	2850	2876	1916	2103	294	3154	142	7004	6300	6810	7112	4663	4048	5957	6816	7069	5898	7054	6516	7058	6870	7194	6812	360	6429	6086	6654	5265	3559	3558	3171	4001	2870	4375
riboD_19	0	0	70	5525	4424	5594	5314	5032	3247	2821	444	976	1484	1224	1162	1360	1158	725	718	258	1067	95	3276	2589	3143	3855	2888	1546	2976	4192	3195	3535	3470	2983	3525	3214	3195	3838	297	4213	2314	2752	1656	1172	1192	900	1407	1142	1809
riboD_20	0	0	545	5005	4034	5254	5004	4701	3161	2803	214	923	1534	1118	971	1289	1181	665	726	172	1126	69	3456	2656	3276	4258	3107	1788	3282	4417	3478	3649	3723	3260	3791	3832	3631	4309	238	4940	2741	3221	1837	1280	1295	1136	1632	1161	1712
riboD_21	0	0	367	3367	2890	3575	3439	3213	2177	1800	247	763	1113	804	677	918	943	418	424	178	719	60	2335	1645	2008	2734	2027	1194	2396	3101	2371	2568	2449	2194	2538	2426	2573	2970	173	3211	1958	2125	1276	894	872	699	1177	769	1301
riboD_22	0	0	51	916	710	1124	1160	1059	619	619	70	179	310	219	232	245	233	101	190	50	232	24	690	508	628	785	578	368	595	862	747	786	771	746	908	749	803	916	88	959	549	642	440	243	297	245	279	280	424
[truncated: 51 more columns]

## Sheet: TTN_riboD_GBC_coverage_raw
Percentile	1	2	3	4	5	6	7	8	9	10	11	12	13	14	15	16	17	18	19	20	21	22	23	24	25	26	27	28	29	30	31	32	33	34	35	36	37	38	39	40	41	42	43	44	45	46	47	48	49
riboD_1	9	7478	7243	4353	7193	7588	7573	7448	7367	7505	7309	7505	7184	7480	464	264	264	263	6835	7077	7268	7272	6662	7116	7258	7166	6957	6544	5820	2330	7168	7389	7130	7133	7094	7230	7087	7327	6879	7160	7216	7279	7215	7281	7342	7054	7282	7023	7088
riboD_2	10	7370	7141	4806	7311	7295	7381	7394	7373	7466	7250	7385	7161	7452	309	293	301	296	6916	7341	7116	7099	6634	6944	6998	6981	6481	6666	5945	2983	6943	7529	7317	7340	7279	7400	7450	7567	7415	7224	7372	7397	7241	7420	7251	6956	7298	7168	7411
riboD_3	51	7412	6895	5672	7288	7429	7444	7272	7261	7353	7161	7411	7145	7485	200	218	219	224	6661	7154	7172	7098	6869	7049	7294	7331	7033	6504	2047	735	7278	7418	7270	7406	7313	7305	7278	7502	7368	7250	7335	7228	7307	7249	7343	6755	7348	7073	7302
riboD_4	15	7382	7222	4128	7252	7275	7304	7281	7300	7320	7429	7446	7191	7462	217	231	242	242	6922	7331	7224	7190	6961	7175	7228	7397	6962	6776	3643	698	6760	7469	7411	7324	7340	7434	7298	7503	7494	7389	7370	7366	7451	7134	7416	7081	7441	7179	7302
riboD_23	2	7381	6937	5455	7250	7505	7575	7438	7120	7300	7158	7424	6826	7403	419	241	253	258	6918	7375	7225	7215	6906	7085	7290	7445	6962	6539	3978	2069	7394	7422	7361	7255	7193	7274	7172	7432	7390	7255	7330	7277	7252	7359	7356	6972	7392	7280	7440
riboD_5	27	7422	7373	6089	7341	7400	7349	7313	7307	7484	7196	7296	7009	7492	370	374	379	380	6848	7360	7166	7256	6833	7112	7276	7373	7010	6618	4547	1218	7216	7437	7119	7207	7250	7074	7145	7394	7229	7159	7069	7103	7285	7287	7221	6880	7373	7290	7350
riboD_6	13	7316	7067	4163	7254	7554	7509	7393	7388	7511	7355	7503	7195	7529	340	344	363	367	6704	7318	7185	7276	6957	7235	7339	7423	6961	6857	5034	3215	7058	7450	7237	7441	7434	7335	7372	7420	7469	7272	7182	7366	7404	7463	7400	6917	7431	7099	7206
riboD_7	14	7252	7060	5690	7113	7256	7346	7166	6854	7186	7142	7269	6812	7323	433	449	397	465	6685	7195	7005	7273	6861	7124	7320	7405	6801	6478	2583	378	7259	7470	7388	7378	7399	7276	7273	7425	7171	7118	7138	7208	7423	7422	7348	7033	7433	7179	7330
riboD_8	9	7351	6763	5156	7215	7527	7559	7447	7298	7570	7298	7470	7108	7549	223	251	245	255	6719	7277	7171	7238	7076	7206	7055	7238	7037	6937	4604	1461	7147	7501	7268	7348	7221	7329	7271	7474	7358	7256	7282	7262	7371	7430	7328	6968	7309	7207	7331
riboD_9	12	7492	7316	3505	7232	7595	7539	7494	7474	7595	7429	7536	7311	7573	277	296	268	325	7048	7431	7336	7457	7076	7273	7609	7507	7204	7027	2724	2146	7011	7519	7408	7238	7464	7358	7209	7488	7525	7374	7309	7392	7465	7375	7407	7056	7490	7351	7437
riboD_10	7	7472	6910	7103	7381	7482	7475	7374	7176	7537	7040	7445	7211	7544	291	308	306	313	6856	7496	7485	7331	7102	7229	7412	7410	7026	6672	3474	1367	7509	7434	7370	7417	7228	7360	7404	7546	7417	7344	7357	7398	7410	7234	7345	6978	7430	7088	7329
riboD_11	11	7445	7170	4609	7341	7602	7585	7496	7462	7554	7359	7503	7208	7474	348	331	348	356	7153	7521	7448	7428	7149	7412	7416	7584	7076	6810	3308	2053	7561	7438	7387	7241	7401	7326	7239	7413	7475	7262	7258	7340	7453	7349	7408	7101	7457	7271	7469
riboD_12	11	7383	7092	5177	7304	7504	7536	7418	7428	7451	7339	7483	7212	7394	556	371	369	375	6552	7129	6919	7125	6842	7149	7303	7484	7120	6910	3352	2340	7226	7461	7078	7280	7089	7375	7359	7459	7395	7283	7265	7376	7472	7432	7412	7062	7416	7260	7375
riboD_13	31	7380	6779	6132	7182	7466	7491	7364	7445	7388	7189	7161	6952	7372	307	326	326	329	6921	7317	7199	7204	6955	7199	7213	7349	6882	6377	5256	1935	7312	7473	7336	7497	7346	7360	7459	7503	7539	7293	7302	7402	7342	7332	7375	6992	7291	7181	7218
riboD_14	8	7502	7004	5666	7408	7535	7560	7479	7460	7596	7427	7526	7227	7604	367	358	349	375	6984	7317	7189	7397	6959	7371	7506	7541	6994	6719	4213	2268	7533	7489	7335	7327	7372	7308	7317	7421	7027	7154	7116	7108	7153	7290	7290	6965	7370	7163	7339
riboD_15	10	7390	7178	6051	7251	7514	7472	7250	7240	7297	7162	7271	6851	7501	396	389	398	397	6886	7186	7213	6703	6319	7279	7424	7432	7091	6828	3183	2637	7426	7499	7369	7512	7500	7465	7302	7579	7009	7250	7377	7397	7432	7470	7393	7118	7478	7231	7322
riboD_16	18	7340	6867	6350	7254	7465	7436	7331	7314	7460	7371	7395	7096	7431	278	278	277	279	6773	7352	7110	7186	6894	7166	7168	7307	6595	6909	4054	1523	7594	7570	7422	7413	7498	7371	7267	7527	7425	7306	7339	7408	7451	7476	7509	7114	7515	7232	7340
riboD_17	8	7358	7397	5242	7353	7451	7518	7414	7423	7494	7370	7526	6904	7571	258	282	285	284	6971	7363	7327	7200	6811	7184	7094	7376	6666	6738	5993	3638	7102	7513	7382	7507	7458	7409	7239	7547	7498	7215	7325	7456	7316	7520	7475	7024	7499	7087	7315
riboD_18	21	7469	6791	5869	7345	7571	7552	7426	7456	7521	7404	7463	7162	7427	263	273	284	282	7131	7327	7345	7296	6946	7363	7428	7444	6985	6730	5422	2164	7128	7580	7405	7463	7419	7365	7418	7532	7507	7338	7398	7108	7443	7388	7470	7104	7380	7137	7153
riboD_19	26	7437	6369	5018	7340	7425	7541	7321	7295	7286	7276	7469	6932	7468	240	253	250	261	6878	7187	7224	7160	6697	7145	7103	7367	7055	6901	3967	415	7400	7550	7521	7505	7396	7503	7421	7555	7453	7410	7397	7508	7247	7518	7454	7047	7466	7274	7468
riboD_20	11	7398	7105	6808	7098	6506	7499	7352	7368	7436	7385	7323	7106	7508	410	407	391	431	7017	7342	7340	7392	7105	7261	7421	7470	7106	6956	2404	1085	7430	7555	7355	7302	7369	7474	7440	7588	7614	7345	7403	7370	7435	7509	7515	7248	7469	7214	7389
riboD_21	15	7461	7115	3209	7332	7467	7517	7451	7379	7428	7256	7477	7253	7520	520	530	498	553	6918	7350	7150	7343	6963	7211	7347	7481	6852	6765	3462	2659	7408	7486	7416	7331	7506	7476	7486	7564	7153	7352	7477	7432	7499	7434	7445	7183	7559	7078	7448
riboD_22	4	7172	7572	3170	7331	7002	5794	7526	7448	6945	6670	7295	6807	7546	284	313	280	318	6896	5641	7157	7514	6557	5720	6275	7356	7049	6312	2002	613	3972	6990	7534	5480	6836	7091	7531	6372	6884	7407	7281	6938	6414	4757	7568	7122	7372	5591	6398
[truncated: 51 more columns]
