# Supplementary material for: Poly(A) selection limits detection of long and alternatively spliced transcripts compared with rRNA depletion in RNA-Sequencing
Source: Research Square preprint supplement (doi:10.21203/rs.3.rs-8195045/v1), 2025-12-08
Supplement: Supplementary file 2 [file 903b6971d3abe7181b5bba5d.xlsx]

## Sheet: Case_summary
		Result summary		Variant details
Case		DROP riboD	DROP polyA	HGVS	Position(s) in hg38	Variant type(s)	Coding impact(s)	Variant frequency exomes/genomes from gnomAD	Variant ACMG/Clinvar	SpliceAI prediction
Case 1	Patient A	We see the acceptor loss, donor loss and acceptor gain. With some intron retention.	We see the acceptor loss and donor loss but no acceptor gain. Also lack of splicing of the next intron. Intron retention in both.	TTN(NM_001267550.2):c.4646-1G>A p.?	2:178777318	SNV	Non coding	NA/NA	LP/NA	Acceptor loss 1.0 -1bp and Donor loss 0.46 102bp and Acceptor gain 0.80 -15bp
Case 2	Patient B	We see the donor loss. With some intron retention.	We see the donor loss, no intron retention though.	TTN(NM_001267550.2):c.25063+1G>A p.?	2:178717942	SNV	Non coding	0.00000137/NA	P/VUS to P	Donor loss 0.84 1bp
Case 3	Patient C	We see the acceptor loss and donor loss and exon skipping. With some intron retention.	We see the acceptor loss and donor loss with intron retention, but no exon skipping. But we see lack of splicing of the other intron surrounding the exon.	TTN(NM_001267550.2):c.19426+2T>A p. ?	2:178728498	SNV	Non coding	0.0000103/NA	LP/NA	Acceptor loss 0.35 -101bp and Donor loss 0.96 2bp
Case 4	Patient D	For the first variant we see the acceptor loss but not the gain. For the second variant we see the acceptor loss and the acceptor gain. Both variants with some intron retention too.	For the first we see acceptor loss with intron retention but no gain. For the second variant we only see the acceptor loss (no intron retention).	TTN(NM_001267550.2):c.15776-1G>T p.?, TTN(NM_001267550.2):c.67349-2A>C p.?	2:178733518, 2:178579850	SNV, SNV	Non coding, Non coding	0.00000755/NA, 0.0000151/0.00000658	LP/VUS, LP/VUS	Acceptor loss 0.99 -1bp and Acceptor gain 0.22 -28bp, Acceptor loss 0.99 -2bp and Acceptor gain 0.83 -17bp

## Sheet: DROP_results
Patient case	Library preparation	Case	chr	start	end	width	strand	hgncSymbol	type	pValue	padjust	myogene_recalculated_padjust_BH	psiValue	deltaPsi	counts	totalCounts	meanCounts	meanTotalCounts	nonsplitCounts	nonsplitProportion	nonsplitProportion_99quantile	annotatedJunction	batch
A	rRNA depleted	Case 1	chr2	178777304	178777419	116	-	TTN	jaccard	6.7613e-08	0.028111	6.39947e-05	0.14	0.14	1083	7566	884.49	92531	3417	0.45	0.55	end	riboD_Oxford--v39
A	polyA(+) selected	Case 1	chr2	178777585	178777703	119	-	TTN	jaccard	1.0111e-05	0.51485	0.00191681275594493	0.5	-0.49	4	8	344.16	349.29	4	0.5	0.13	both	polyA_Oxford--v39
A	polyA(+) selected	Case 1	chr2	178777318	178777419	102	-	TTN	jaccard	2.4526e-07	0.043383	0.000107060584207493	0.38	-0.61	3	8	318.38	321.67	3	0.38	0.21	both	polyA_Oxford--v39
A	rRNA depleted	Case 1	chr2	178777318	178777419	102	-	TTN	jaccard	5.2276e-06	0.43592	0.00174175	0.71	-0.25	3066	4345	43427.3	45414.9	176	0.04	0.04	both	riboD_Oxford--v39
B	rRNA depleted	Case 2	chr2	178717811	178717942	132	-	TTN	jaccard	1.0976e-08	0.0054759	1.57817e-05	0.58	-0.35	28323	49042	43914	47004.3	12336	0.25	0.16	both	riboD_Oxford--v39
B	polyA(+) selected	Case 2	chr2	178717811	178717942	132	-	TTN	jaccard	5.9642e-05	1	0.00660870009070958	0.62	-0.35	10	16	190.88	197.53	5	0.31	0.33	both	polyA_Oxford--v39
C	rRNA depleted	Case 3	chr2	178728398	178728499	102	-	TTN	jaccard	4.2352e-15	1.0565e-08	4.56522e-11	0.33	-0.64	15112	45514	56016	57819.7	15384	0.34	0.19	both	riboD_Oxford--v39
C	rRNA depleted	Case 3	chr2	178728398	178728890	493	-	TTN	jaccard	8.551e-15	1.0665e-08	8.29558e-11	0.22	0.22	13412	61932	499.58	109522	8660	0.14	0.08	start	riboD_Oxford--v39
C	polyA(+) selected	Case 3	chr2	178728779	178728890	112	-	TTN	jaccard	5.4193e-05	1	0.00625984513069909	0.64	-0.36	7	11	300.15	302.35	1	0.09	0.09	both	polyA_Oxford--v39
C	polyA(+) selected	Case 3	chr2	178728398	178728499	102	-	TTN	jaccard	1.8429e-10	0.00042227	2.26949389268293e-07	0.27	-0.72	4	15	292.2	295.35	8	0.53	0.25	both	polyA_Oxford--v39
D	rRNA depleted	Case 4	chr2	178579849	178579938	90	-	TTN	jaccard	6.5935e-17	1.1451e-10	1.27931e-12	0.25	-0.72	8425	33421	44588.4	45581.9	4288	0.13	0.08	both	riboD_Oxford--v39
D	rRNA depleted	Case 4	chr2	178733518	178733613	96	-	TTN	jaccard	1.5139e-05	0.82761	0.00363236	0.58	-0.37	49054	84518	55232.8	59144.9	28073	0.33	0.17	both	riboD_Oxford--v39
D	rRNA depleted	Case 4	chr2	178579834	178579938	105	-	TTN	jaccard	9.1805e-17	1.1451e-10	1.48438e-12	0.52	0.52	20640	39865	400.75	78851.8	10732	0.27	0.46	end	riboD_Oxford--v39
D	polyA(+) selected	Case 4	chr2	178733518	178733613	96	-	TTN	jaccard	2.8582e-06	0.22583	0.00074260252212693	0.65	-0.33	17	26	322.16	325.73	9	0.35	0.33	both	polyA_Oxford--v39
D	polyA(+) selected	Case 4	chr2	178579849	178579938	90	-	TTN	jaccard	2.833e-07	0.043276	0.000120201729971989	0.55	-0.45	6	11	235.14	237.12	1	0.09	0.09	both	polyA_Oxford--v39
